# Supplementary material for: Quaternary Mammals from Central-Western Argentina in the Stratigraphic Context of Southern South America
Source: MDPI journal article supplement (doi:10.3390/quat6040059), 2023-12-04
Supplement: s1 [file s1]

## Article

# Quaternary Mammals from Central-Western Argentina in the Stratigraphic Context of Southern South America

Esperanza Cerdeño <sup>1,\*</sup>, Natalia P. Lucero <sup>2</sup> and Jorge O. Chiesa <sup>3</sup>

<sup>1</sup> Paleobiología y Paleoecología, Instituto de Nivología, Glaciología y Ciencias Ambientales (IANIGLA), CONICET-Mendoza, Avda. Ruiz Leal s/n, 5500 Mendoza, Argentina

<sup>2</sup> Universidad Nacional de Los Comechingones, Héroes de Malvinas 1500, Villa de Merlo, 5881 San Luis Argentina; nlucero@unlc.edu.ar

<sup>3</sup> Departamento de Geología (FCFMyN-UNSL), Ejército de los Andes 950, 5700 San Luis, Argentina; jochiesa59@gmail.com

\* Correspondence: espe@mendoza-conicet.gob.ar

**Table S1. S7.** Dimensions of the skull and the mandibular, dental, and postcranial elements of different Quaternary mammals from San Luis Province, Argentina.

**Citation:** Cerdeño, E.; Lucero, N.P.; Chiesa, J.O. Quaternary Mammals from Central-Western Argentina in the Stratigraphic Context of Southern South America. *Quaternary* **2023**, *6*, x. <https://doi.org/10.3390/xxxxx>

Academic Editor: Luca Pandolfi

Received: 22 June 2023

Revised: 1 September 2023

Accepted: 27 November 2023

Published: date

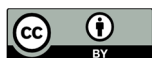

**Copyright:** © 2023 by the authors.

Submitted for possible open access

publication under the terms and

conditions of the Creative Commons

Attribution (CC BY) license

([https://creativecommons.org/licenses](https://creativecommons.org/licenses/by/4.0/)

/by/4.0/).

**Table S1.** The skull and upper dental measurements (in mm) of *Neosclerocalyptus paskoensis* from Barranquita Fm., El Carrizal. Abbreviations: L, length; Mf, upper molariform; W, width.

| <b>MHIN-UNSL-GEO V 488</b>         |             |   |            |
|------------------------------------|-------------|---|------------|
| <b>Maximal skull length</b>        |             |   | <b>300</b> |
| Maximal nasal width                |             |   | 180        |
| Postorbital width                  |             |   | 115        |
| Skull height at Mf1 level          |             |   | 136        |
| Skull height at Mf5 level          |             |   | 165        |
| Maximal height of nostrils         |             |   | 62         |
| Maximal width of nostrils          |             |   | 130        |
| Maximal palatal length             |             |   | -          |
| Maximal palatal width at Mf1 level |             |   | 40         |
| Maximal palatal width at Mf5 level |             |   | 35         |
| Length of dental series (Mf1-6)    |             |   | 120        |
| Mf1                                | middle lobe | L | 10         |
|                                    |             | W | 5.5        |
| Mf2                                | middle lobe | L | 15         |
|                                    |             | W | 11         |
| Mf3                                | middle lobe | L | -          |
|                                    |             | W | -          |
| Mf4                                | middle lobe | L | 19         |
|                                    |             | W | 10         |
| Mf5                                | middle lobe | L | 20         |
|                                    |             | W | 11         |
| Mf6                                | middle lobe | L | 19         |
|                                    |             | W | 10.5       |
| Mf7                                | middle lobe | L | -          |
|                                    |             | W | -          |
| Mf8                                | middle lobe | L | -          |
|                                    |             | W | -          |

**Table S2.** Mandible and lower dental measurements (in mm) of *Neosclerocalyptus paskoensis* from Barranquita Fm., El Carrizal. Abbreviations: L, length; mf, lower molariform; W, width.

| <b>MHIN-UNSL-GEO V 489</b>                      |             |   |            |
|-------------------------------------------------|-------------|---|------------|
| <b>Maximal length</b>                           |             |   | <b>243</b> |
| Alveolar length of pre-dental symphysis         |             |   | 35         |
| Symphyseal length along the suture              |             |   | 97         |
| Height of the horizontal ramus at mf1 level     |             |   | 45         |
| Height of the horizontal ramus at mf5 level     |             |   | 71         |
| Height of the horizontal ramus at mf8 level     |             |   | 66         |
| Length of the ascending ramus at alveolar level |             |   | 111        |
| Height of the ascending ramus                   |             |   | 187        |
| Length of dental series                         |             |   | 178        |
| mf1                                             | middle lobe | L | 11         |
|                                                 |             | W | 6          |
| mf2                                             | middle lobe | L | 16         |
|                                                 |             | W | 7          |
| mf3                                             | middle lobe | L | 19         |
|                                                 |             | W | 9          |
| mf4                                             | middle lobe | L | 20         |
|                                                 |             | W | 11         |
| mf5                                             | middle lobe | L | -          |
|                                                 |             | W | -          |

|     |             |   |   |
|-----|-------------|---|---|
| mf6 | middle lobe | L | - |
|     |             | W | - |
| mf7 | middle lobe | L | - |
|     |             | W | - |
| mf8 | middle lobe | L | - |
|     |             | W | - |

**Table S3.** Dimensions (in mm) of the long bones of *Scelidothorium leptocephalum* from Barranquita Fm., Pancanta Valley. Abbreviations: APD, anteroposterior diameter; dis., distal; distolat., distal-lateral side; distomed., distal-medial side; L, length; Max., maximal; TD, transversal diameter.

| MHIN-UNSL-GEO |        |              |               |               |               |
|---------------|--------|--------------|---------------|---------------|---------------|
| Humerus       | Max. L | TD proximal  | TD max. dis.  | TD diaphysis  |               |
| V 203         | 385    | 155          | 74            | 97            |               |
| Femur         | Max. L | TD diaphysis | APD diaphysis | APD distolat. | APD distomed. |
| V 201         | 480    | 189          | 60            | 77            | 106           |
| V 202         | 480    | 191          | 60            | 75            | 106           |
| Tibia         | Max. L | TD proximal  | TD max. dis.  | TD diaphysis  | APD diaphysis |
| V 205         | 272    | 185          | 155           | 78            | 53            |
| V 206         | 270    | 185          | 155           | 76            | 53            |

**Table S4.** Dimensions (in mm) of the calcaneus and astragalus of *Scelidothorium leptocephalum* from Barranquita Fm., Pancanta Valley. Abbreviations: APD, anteroposterior diameter; L, length; Max., maximal; TD, transversal diameter.

| MHIN-UNSL-GEO |        |             |             |              |  |
|---------------|--------|-------------|-------------|--------------|--|
| Calcaneus     | Max. L | TD proximal | minimal TD  | TD max. dis. |  |
| V 209         | 220    | 65          | 53          | 108          |  |
| Astragalus    | APD    | Max. TD     | Lateral APD | Medial APD   |  |
| V 207         | 122    | 103         | 80          | 50           |  |

**Table S5.** Postcranial measurements (in mm) of *Megatherium americanum* from Barranquita Fm., Arroyo Barranquita. Abbreviations: L, length; Max., maximal; TD, transversal diameter.

| MHIN-UNSL-GEO    | Max. L | TD proximal | TD distal |
|------------------|--------|-------------|-----------|
| Humerus<br>V 215 | 420    | 120         | 250       |
| Radius<br>V 213  | 480    | 89          | -         |
| Ulna<br>V 213    | 480    | 200         | -         |

**Table S6.** Dimensions (in mm) of the first phalanx of *Macrauchenia patachonica* from Barranquita Fm., Arroyo Los Araditos. Abbreviations: APD, anteroposterior diameter; L, length; Max., maximal; TD, transversal diameter.

| MHIN-UNSL-GEO | Max. L | proximal TD | proximal APD | distal TD | distal APD |
|---------------|--------|-------------|--------------|-----------|------------|
| V 467         | 85.0   | 41.5        | 39.5         | 40.0      | 28.0       |

**Table S7.** Postcranial measurements (in mm) of *Notiomastodon platensis* from Río Conlara Fm., Punta del Agua. Abbreviations: ant., anterior; APD, anteroposterior diameter; H, height; L, length; Max., maximal; post., posterior; Prox., proximal; TD, transversal diameter.

| MHIN-UNSL-GEO           | Max. TD                | Max TD<br>ant. facets    | Max TD<br>post. facets | Max. H                | Max. APD |
|-------------------------|------------------------|--------------------------|------------------------|-----------------------|----------|
| <b>Atlas</b><br>V 224   | 420                    | 250                      | 220                    | 290                   | 150      |
| <b>Scapula</b><br>V 221 |                        |                          |                        | 800                   | 580      |
| <b>Radius</b><br>V 222  | <b>Prox. TD</b><br>106 | <b>Prox. APD</b><br>82.5 | <b>Max. H</b><br>640   | <b>Distal TD</b><br>- |          |
| <b>Tibia</b><br>V 223   | 130                    |                          | 520                    | 140                   |          |
